# Supplementary material for: Facile preparation of injectable, thermosensitive, and physically cross-linked hemostatic hydrogel with rapid gelation and a robust network
Source: Royal Society of Chemistry journal article supplement (doi:10.1039/d4nj01476f), 2024-01-01
Supplement: d4nj01476f4.pdf [file d4nj01476f4.pdf]

## Supporting Information

### **Facile Preparation of Injectable, Thermosensitive, and Physically Cross-linked Hemostatic Hydrogel with Rapid Gelation and Robust Network**

Xue Wang,<sup>a</sup> Wentao Liu,<sup>b,\*</sup> Yue Wang,<sup>a</sup> Zhaosheng Hou,<sup>c</sup> Pengbo She,<sup>a</sup> Yaozhen Yang,<sup>a</sup> Xiuxiu Li,<sup>a</sup> Xiaolong Wang,<sup>d</sup> Jintong Liu,<sup>a</sup> Xiangzheng Liu,<sup>a</sup> and Jing Xu<sup>a,\*</sup>

<sup>a</sup>Shandong Provincial Key Laboratory of Molecular Engineering, School of Chemistry and Chemical Engineering, Qilu University of Technology (Shandong Academy of Sciences), Jinan 250353, P. R. China

<sup>b</sup>Key Laboratory of Leather Chemistry and Engineering of Ministry of Education, College of Biomass Science and Engineering, Sichuan University, Chengdu 610065, P. R. China

<sup>c</sup>College of Chemistry, Chemical Engineering and Materials Science, Shandong Normal University, Jinan 250100, P. R. China

<sup>d</sup>Laboratory Management Office, Shandong University of Traditional Chinese Medicine, Jinan 250353, P. R. China

\*Corresponding Authors:

Wentao Liu, *E-mail*: [liuwt@scu.edu.cn](mailto:liuwt@scu.edu.cn), <https://orcid.org/0000-0002-0493-6709>

Jing Xu, *E-mail*: [xujing@qlu.edu.cn](mailto:xujing@qlu.edu.cn)

## Experimental Section

**Synthesis of 2-((diethylcarbamothioyl)thio) Acetic Acid (RAFT CTA):** The synthesis of RAFT CTA was carried out as follows<sup>1</sup>: sodium chloroacetate (5.17 g, 44.5 mmol) and NaDC (10.0 g, 44.4 mmol) were dissolved in 100 mL deionized water. The solution was stirred for 24 h at room temperature. HCl (3 mol/L) was then added to the solution to precipitate the product. The product was filtered and recrystallized from acetone to obtain the final product (white powder, 27% yield).

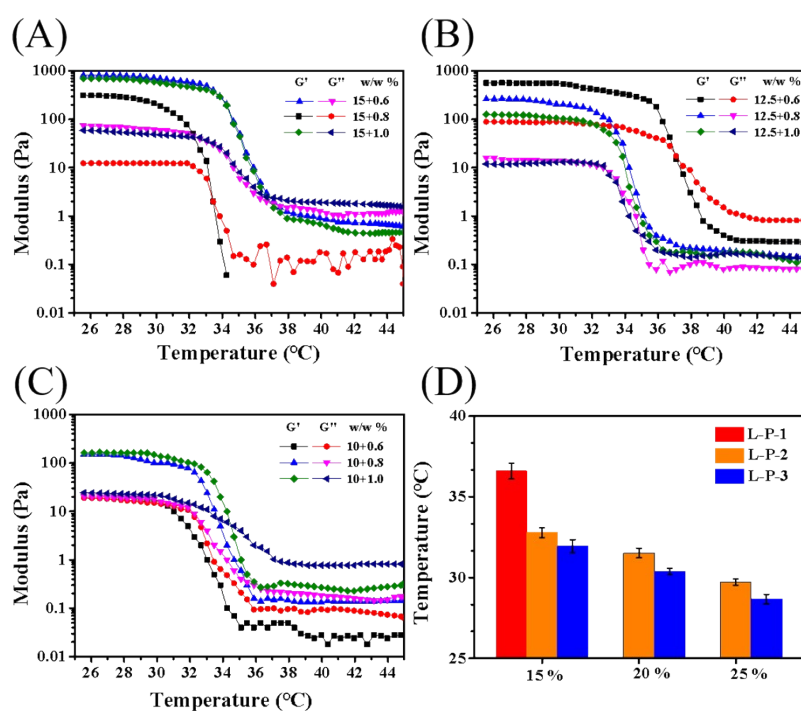

**Figure S1.** Temperature dependences of the dynamic moduli ( $G'$  and  $G''$ ) of the G/HA solutions with different proportions of components. A) The G/HA solutions prepared using 15 w/w% gelatin and 0.6%, 0.8%, and 1.0% (w/w) HA. B) The G/HA solutions prepared using 12.5 w/w% gelatin and 0.6%, 0.8%, and 1.0% (w/w) HA. C) The G/HA solutions prepared using 10 w/w% gelatin and 0.6%, 0.8%, and 1.0% (w/w) HA. D) The LCST of L-P-1, L-P-2, and L-P-3.

For the preparation of the hydrogels  $G_{15}/HA_{0.6}/L-P-1$ , L-P-1 was difficult to dissolve in water due to its strong hydrophobic end-group effect, resulting in the inability to prepare the L-P-1 solution with higher concentration (e.g. 20% and 25% (w/w)). So only the  $G_{15}/HA_{0.6}/L-P-1_{15}$  hydrogels were prepared (**Table S1**).

**Table S1.** Preparation of different  $G_{15}/HA_{0.6}/L-P-1_{15}$  hemostatic hydrogel samples and their formulation.

| No. | Sample                             | G(w/w %) | HA(w/w %) | L-P-1 (w/w %) | G/HA:L-P-1 (w/w %) <sup>a</sup> |
|-----|------------------------------------|----------|-----------|---------------|---------------------------------|
| 1   | $G_{15}/HA_{0.6}/L-P-1_{15}$ (1:9) | 15       | 0.6       | 15            | 1:9                             |
| 2   | $G_{15}/HA_{0.6}/L-P-1_{15}$ (2:8) | 15       | 0.6       | 15            | 2:8                             |
| 3   | $G_{15}/HA_{0.6}/L-P-1_{15}$ (3:7) | 15       | 0.6       | 15            | 3:7                             |

<sup>a</sup> G/HA:L-P-1 (w/w %) indicates the weight ratio of G/HA to L-P-1.

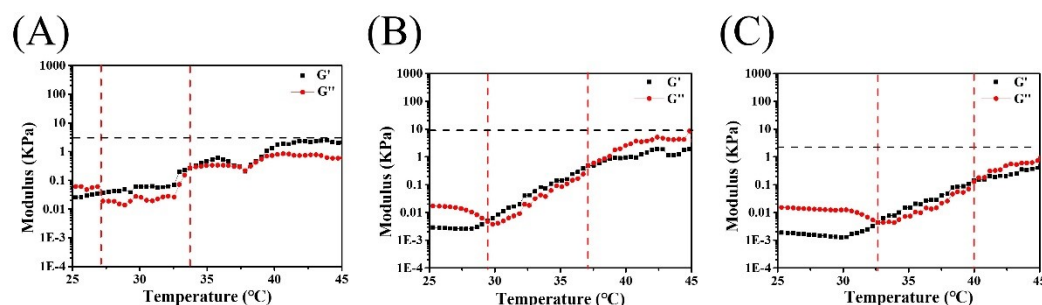

**Figure S2.** Temperature dependences of the dynamic moduli ( $G'$  and  $G''$ ) of the  $G_{15}/HA_{0.6}/L-P-1_{15}$  hydrogels with different weight ratios of G/HA to L-P-1. A)  $G_{15}/HA_{0.6}/L-P-1_{15}$  (1:9). B)  $G_{15}/HA_{0.6}/L-P-1_{15}$  (2:8). C)  $G_{15}/HA_{0.6}/L-P-1_{15}$  (3:7).

**Table S2.** Preparation of different  $G_{15}/HA_{0.6}/L-P-2$  hemostatic hydrogel samples and their formulation.

| No. | Sample                                                        | G(w/w %) | HA(w/w %) | L-P-2 (w/w %) | G/HA: L-P-2 (w/w %) <sup>b</sup> |
|-----|---------------------------------------------------------------|----------|-----------|---------------|----------------------------------|
| 1   | G <sub>15</sub> /HA <sub>0.6</sub> /L-P-2 <sub>15</sub> (1:9) | 15       | 0.6       | 15            | 1:9                              |
| 2   | G <sub>15</sub> /HA <sub>0.6</sub> /L-P-2 <sub>15</sub> (2:8) | 15       | 0.6       | 15            | 2:8                              |
| 3   | G <sub>15</sub> /HA <sub>0.6</sub> /L-P-2 <sub>15</sub> (3:7) | 15       | 0.6       | 15            | 3:7                              |
| 4   | G <sub>15</sub> /HA <sub>0.6</sub> /L-P-2 <sub>20</sub> (1:9) | 15       | 0.6       | 20            | 1:9                              |
| 5   | G <sub>15</sub> /HA <sub>0.6</sub> /L-P-2 <sub>20</sub> (2:8) | 15       | 0.6       | 20            | 2:8                              |
| 6   | G <sub>15</sub> /HA <sub>0.6</sub> /L-P-2 <sub>20</sub> (3:7) | 15       | 0.6       | 20            | 3:7                              |
| 7   | G <sub>15</sub> /HA <sub>0.6</sub> /L-P-2 <sub>25</sub> (1:9) | 15       | 0.6       | 25            | 1:9                              |
| 8   | G <sub>15</sub> /HA <sub>0.6</sub> /L-P-2 <sub>25</sub> (2:8) | 15       | 0.6       | 25            | 2:8                              |
| 9   | G <sub>15</sub> /HA <sub>0.6</sub> /L-P-2 <sub>25</sub> (3:7) | 15       | 0.6       | 25            | 3:7                              |

<sup>b</sup> G/HA:L-P-2 (w/w %) indicates the weight ratio of G/HA to L-P-2.

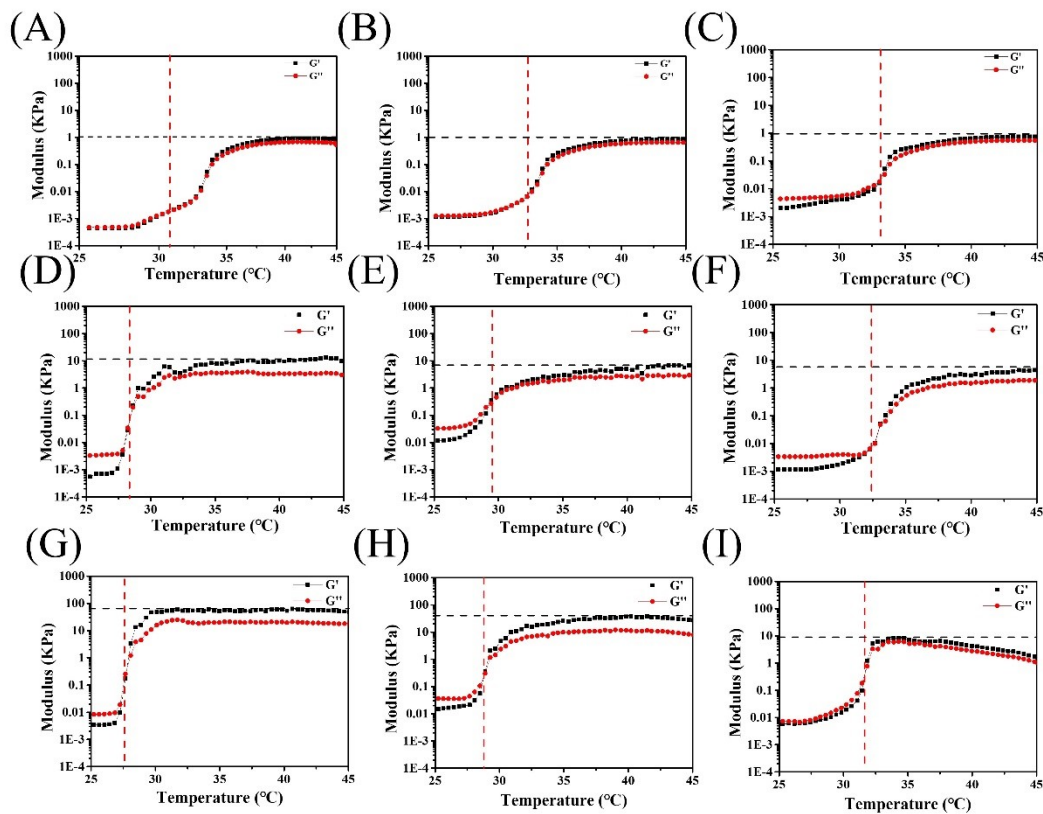

**Figure S3.** Temperature dependences of the dynamic moduli ( $G'$  and  $G''$ ) of the  $G_{15}/HA_{0.6}/L-P-2$  hydrogels with different proportions of components. The temperature at the intersection of  $G'$  and  $G''$  represents the phase transition temperature (LCST). A)

G<sub>15</sub>/HA<sub>0.6</sub>/L-P-2<sub>15</sub> (1:9). B) G<sub>15</sub>/HA<sub>0.6</sub>/L-P-2<sub>15</sub> (2:8). C) G<sub>15</sub>/HA<sub>0.6</sub>/L-P-2<sub>15</sub> (3:7). D) G<sub>15</sub>/HA<sub>0.6</sub>/L-P-2<sub>20</sub> (1:9). E) G<sub>15</sub>/HA<sub>0.6</sub>/L-P-2<sub>20</sub> (2:8). F) G<sub>15</sub>/HA<sub>0.6</sub>/L-P-2<sub>20</sub> (3:7). G) G<sub>15</sub>/HA<sub>0.6</sub>/L-P-2<sub>25</sub> (1:9). H) G<sub>15</sub>/HA<sub>0.6</sub>/L-P-2<sub>25</sub> (2:8). I) G<sub>15</sub>/HA<sub>0.6</sub>/L-P-2<sub>25</sub> (3:7).

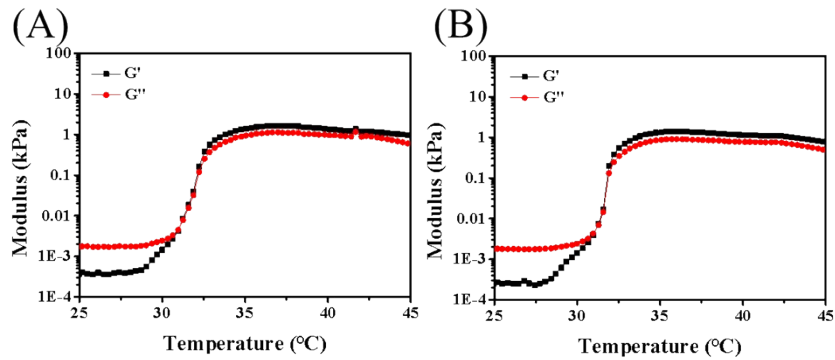

**Figure S4.** Temperature dependence of the dynamic moduli ( $G'$  and  $G''$ ) of 20% L-P.

A) L-P-2. B) L-P-3.

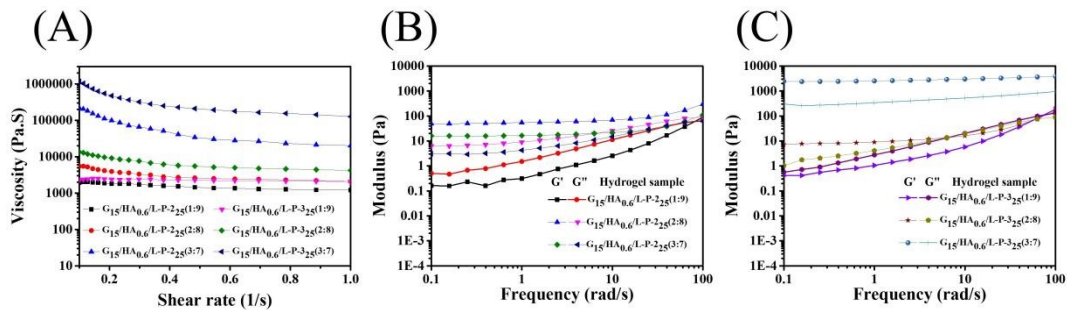

**Figure S5.** Viscoelastic moduli and viscosity analysis of the hydrogels G<sub>15</sub>/HA<sub>0.6</sub>/L-P<sub>25</sub> with different proportions of components. A) Shear-thinning behavior of hydrogels. The dependences of dynamic moduli ( $G'$  and  $G''$ ) on dynamic frequency for the hydrogels B) G<sub>15</sub>/HA<sub>0.6</sub>/L-P-2<sub>25</sub> and C) G<sub>15</sub>/HA<sub>0.6</sub>/L-P-3<sub>25</sub> with different weight ratios of G/HA to L-P.

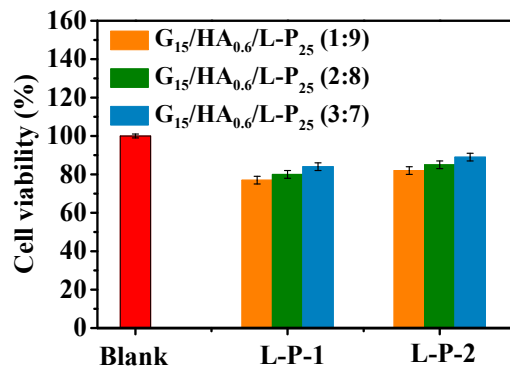

**Figure S6.** The cell viability of the blank group, the G<sub>15</sub>/HA<sub>0.6</sub>/L-P-1<sub>15</sub> and G<sub>15</sub>/HA<sub>0.6</sub>/L-P-2<sub>25</sub> hydrogel groups after incubation for 24 h.

### **Movie Caption List**

**Movie S1.** Demonstration of burst pressure testing of the hydrogel G<sub>15</sub>/HA<sub>0.6</sub>/L-P-3<sub>25</sub> (1:9) adhered to pigskin at 36.5 ± 0.5 °C.

**Movie S2.** Experimental demonstration of the rapid thermoresponsive sol-gel transition and strong adhesion of the hydrogel G<sub>15</sub>/HA<sub>0.6</sub>/L-P-3<sub>25</sub> (1:9) on the wet surface of glass at 36.5 ± 0.5 °C.

**Movie S3.** Experimental demonstration of the rapid thermoresponsive sol-gel transition of the hydrogel G<sub>15</sub>/HA<sub>0.6</sub>/L-P-3<sub>25</sub> (1:9) on the wet surface of finger joint and the stable wet adhesion of hydrogel under ultrasonic treatment.

### **References**

(1) Xing, X.; Yang, H.; Tao, M.; Zhang, W., An overwhelmingly selective colorimetric sensor for Ag<sup>+</sup> using a simple modified polyacrylonitrile fiber. *Journal of Hazardous Materials* 2015, 297, 207-216.
